# Supplementary material for: Residential flood loss estimated from Bayesian multilevel models
Source: Copernicus journal article supplement (doi:10.5194/nhess-2020-388), 2020-12-03
Supplement: Supplementary file 1 [file nhess-2020-388-supplement.pdf]

Supplement of

## Residential flood loss estimated from Bayesian multilevel models

Guilherme S. Mohor et al.

Table S1. Comparison of candidate models of each variants by their difference in the expected log pointwise predictive density (elpd) to the highest accuracy model (fit12) and the standard error of the differences; model candidates with cumulative predictors from 1 to 12

| Single-Level |           |         |          | Flood Type* |           |         |          | Region |           |         |          | Event |           |         |          | Predictors set                                |
|--------------|-----------|---------|----------|-------------|-----------|---------|----------|--------|-----------|---------|----------|-------|-----------|---------|----------|-----------------------------------------------|
| Model        | elpd_diff | se_diff | elpd_loo | Model       | elpd_diff | se_diff | elpd_loo | Model  | elpd_diff | se_diff | elpd_loo | Model | elpd_diff | se_diff | elpd_loo |                                               |
| fit12        | 0         | 0       | 2134.6   | fit12       | 0         | 0       | 2134.3   | fit12  | 0         | 0       | 2125.2   | fit12 | 0         | 0       | 2134.4   | WD+BA+Con+Dur+Pre+Ins+Eff+Eme+Cel+Vel+ Exp+BQ |
| fit11        | -4.1      | 3.1     | 2130.5   | fit11       | -2.4      | 2.9     | 2131.8   | fit11  | -3.2      | 2.8     | 2122     | fit11 | -0.7      | 2.5     | 2133.6   | WD+BA+Con+Dur+Pre+Ins+Eff+Eme+Cel+Vel+ Exp    |
| fit10        | -9.4      | 4.5     | 2125.1   | fit10       | -8.4      | 4.6     | 2125.9   | fit10  | -4.7      | 3.8     | 2120.5   | fit10 | -1        | 3       | 2133.3   | WD+BA+Con+Dur+Pre+Ins+Eff+Eme+Cel+Vel         |
| fit9         | -10.6     | 5.1     | 2123.9   | fit9        | -8.1      | 5       | 2126.2   | fit7   | -9.3      | 5.6     | 2115.9   | fit9  | -1.7      | 3.7     | 2132.6   | WD+BA+Con+Dur+Pre+Ins+Eff+Eme+Cel             |
| fit8         | -12.6     | 5.4     | 2122     | fit8        | -8.8      | 5.3     | 2125.4   | fit8   | -9.8      | 5.4     | 2115.4   | fit8  | -3.9      | 4.4     | 2130.5   | WD+BA+Con+Dur+Pre+Ins+Eff+Eme                 |
| fit7         | -11.7     | 5.4     | 2122.9   | fit7        | -7.3      | 5.3     | 2127     | fit9   | -7.9      | 4.9     | 2117.3   | fit7  | -1.9      | 4.5     | 2132.5   | WD+BA+Con+Dur+Pre+Ins+Eff                     |
| fit6         | -16.5     | 6.5     | 2118.1   | fit6        | -10.2     | 6.5     | 2124     | fit6   | -13.3     | 6.4     | 2111.9   | fit6  | -4        | 5.3     | 2130.4   | WD+BA+Con+Dur+Pre+Ins                         |
| fit5         | -24.8     | 7.4     | 2109.8   | fit5        | -20.9     | 7.8     | 2113.4   | fit5   | -17.3     | 7.1     | 2108     | fit5  | -8        | 6.1     | 2126.4   | WD+BA+Con+Dur+Pre                             |
| fit4         | -42.3     | 9.1     | 2092.2   | fit4        | -36.2     | 9       | 2098.1   | fit4   | -30.9     | 8.6     | 2094.3   | fit4  | -12       | 6.7     | 2122.4   | WD+BA+Con+Dur                                 |
| fit3         | -55       | 10.1    | 2079.6   | fit3        | -41       | 9.5     | 2093.2   | fit3   | -40       | 9.5     | 2085.3   | fit3  | -24.4     | 8.1     | 2109.9   | WD+BA+Con                                     |
| fit2         | -100.8    | 14.1    | 2033.8   | fit2        | -76.9     | 13      | 2057.3   | fit2   | -83.5     | 13.9    | 2041.8   | fit2  | -60.2     | 12.8    | 2074.2   | WD+BA                                         |
| fit1         | -148.1    | 17      | 1986.4   | fit1        | -115.6    | 15.3    | 2018.7   | fit1   | -122.6    | 16.3    | 2002.6   | fit1  | -98.1     | 15.7    | 2036.3   | WD                                            |

Table S2. Comparison of candidate models of each variants by their difference in the expected log pointwise predictive density (elpd) to the highest accuracy model (by each model variant) and the standard error of the differences; model candidates with predictors 1 to 6 plus one of the remaining predictors

| Single-Level |           |         |          | Flood Type |           |         |          | Region |           |         |          | Event |           |         |          | Predictor set (for Year variant) |
|--------------|-----------|---------|----------|------------|-----------|---------|----------|--------|-----------|---------|----------|-------|-----------|---------|----------|----------------------------------|
| Model        | elpd_diff | se_diff | elpd_loo | Model      | elpd_diff | se_diff | elpd_loo | Model  | elpd_diff | se_diff | elpd_loo | Model | elpd_diff | se_diff | elpd_loo |                                  |

|         |      |     |        |         |      |     |        |         |      |     |        |         |      |     |        |                           |
|---------|------|-----|--------|---------|------|-----|--------|---------|------|-----|--------|---------|------|-----|--------|---------------------------|
| fit6+11 | 0    | 0   | 2123   | fit6+11 | 0    | 0   | 2130.8 | fit6+7  | 0    | 0   | 2115.9 | fit6+7  | 0    | 0   | 2132.5 | WD+BA+Con+Dur+Pre+Ins+Eff |
| fit6+7  | -0.1 | 4.8 | 2122.9 | fit6+7  | -3.8 | 5   | 2127   | fit6+10 | -0.4 | 4.6 | 2115.6 | fit6+9  | -0.4 | 4.4 | 2132.1 | WD+BA+Con+Dur+Pre+Ins+Cel |
| fit6+12 | -1.7 | 4.5 | 2121.3 | fit6+9  | -6.4 | 4.3 | 2124.4 | fit6+11 | -0.9 | 4.4 | 2115   | fit6+12 | -1.3 | 3.6 | 2131.2 | WD+BA+Con+Dur+Pre+Ins+BQ  |
| fit6+9  | -3.1 | 4.7 | 2119.9 | fit6+12 | -6.6 | 4.6 | 2124.2 | fit6+9  | -1.3 | 4.8 | 2114.7 | fit6+10 | -1.4 | 3.6 | 2131.1 | WD+BA+Con+Dur+Pre+Ins+Vel |
| fit6+10 | -4.1 | 3.8 | 2118.9 | fit6    | -6.7 | 3.9 | 2124   | fit6+12 | -2.8 | 4.2 | 2113.2 | fit6    | -2.1 | 3   | 2130.4 | WD+BA+Con+Dur+Pre+Ins     |
| fit6    | -5   | 3.3 | 2118.1 | fit6+10 | -7.6 | 4.1 | 2123.2 | fit6    | -4   | 3.4 | 2111.9 | fit6+11 | -2.5 | 3.3 | 2130   | WD+BA+Con+Dur+Pre+Ins+Exp |
| fit6+8  | -5.8 | 3.3 | 2117.2 | fit6+8  | -8.4 | 3.9 | 2122.3 | fit6+8  | -4.3 | 3.7 | 2111.7 | fit6+8  | -3.5 | 3   | 2129   | WD+BA+Con+Dur+Pre+Ins+Eme |

Table S3. Comparison of candidate models of each variants by their difference in the expected log pointwise predictive density (elpd) to the reference model (fit6) and the standard error of the differences; model candidates with predictors 1 to 5 plus a combination of predictors 6, 7, and 11

| Single-Level |           |         |          | Flood Type |           |         |          | Region    |           |         |          | Year      |           |         |          | Predictor set for Year variant |
|--------------|-----------|---------|----------|------------|-----------|---------|----------|-----------|-----------|---------|----------|-----------|-----------|---------|----------|--------------------------------|
| Model        | elpd_diff | se_diff | elpd_loo | Model      | elpd_diff | se_diff | elpd_loo | Model     | elpd_diff | se_diff | elpd_loo | Model     | elpd_diff | se_diff | elpd_loo |                                |
| fit5+7       | -3.6      | 5.7     | 2114.5   | fit5+7     | -6.2      | 6.1     | 2117.8   | fit5+11   | -0.9      | 4.2     | 2111.0   | fit5+11   | -4.3      | 4.0     | 2126.1   | WD+BA+Con+Dur+Pre+Exp          |
| fit5+11      | -3.1      | 5.5     | 2115.0   | fit5+11    | -3.5      | 6.4     | 2120.5   | fit5+7    | -0.2      | 4.7     | 2111.7   | fit5+7    | -2.3      | 4.6     | 2128.1   | WD+BA+Con+Dur+Pre+Eff          |
| fit6         | 0         | 0       | 2118.1   | fit6       | 0         | 0       | 2124.0   | fit6      | 0         | 0       | 2111.9   | fit5+7+11 | -1.4      | 5.0     | 2129.0   | WD+BA+Con+Dur+Pre+Eff+Exp      |
| fit5+7+11    | 1.6       | 6.7     | 2119.7   | fit5+7+11  | 0.1       | 7.4     | 2124.1   | fit5+7+11 | 2.3       | 5.5     | 2114.2   | fit6+11   | -0.3      | 1.7     | 2130.0   | WD+BA+Con+Dur+Pre+Ins+Exp      |
| fit6+7       | 4.9       | 3.5     | 2122.9   | fit6+7     | 3.0       | 3.5     | 2127.0   | fit6+11   | 3.1       | 2.8     | 2115.0   | fit6      | 0         | 0       | 2130.4   | WD+BA+Con+Dur+Pre+Ins          |
| fit6+11      | 5.0       | 3.3     | 2123.0   | fit6+11    | 6.7       | 3.9     | 2130.8   | fit6+7    | 4.0       | 3.4     | 2115.9   | fit6+7+11 | 1.5       | 3.5     | 2131.9   | WD+BA+Con+Dur+Pre+Ins+Eff+Exp  |
| fit6+7+11    | 9.6       | 4.8     | 2127.6   | fit6+7+11  | 9.6       | 5.4     | 2133.6   | fit6+7+11 | 6.4       | 4.3     | 2118.3   | fit6+7    | 2.1       | 3.0     | 2132.5   | WD+BA+Con+Dur+Pre+Ins+Eff      |

Table S4. Central values of each variable per region grouped by similarity after post hoc tests with a significance of 0.05 (central value is the average of numeric Variables, the mode of nominal variables)

| REGION                                                             | South   |   | East    |   | W_N     |   |
|--------------------------------------------------------------------|---------|---|---------|---|---------|---|
| <b>n</b>                                                           | 1155    |   | 3032    |   | 281     |   |
| <b>Water depth</b>                                                 | 32.264  | a | 59.629  | c | -64.798 | b |
| <b>Duration</b>                                                    | 93.741  | a | 173.3   | b | 115.87  | a |
| <b>Velocity</b>                                                    | 29.686  | a | 29.275  | a | 22.266  | b |
| <b>Contamination</b>                                               | 0.48336 | a | 0.55967 | c | 0.25818 | b |
| <b>Emergency measures</b>                                          | 55.463  |   | 52.309  |   | 57.544  |   |
| <b>Property-level precautionary measures (PLPM) implementation</b> | 0.71342 | a | 0.68865 | a | 0.98932 | b |

|                                   |         |   |         |   |          |   |
|-----------------------------------|---------|---|---------|---|----------|---|
| <b>Perceived Efficacy of PLPM</b> | 27.826  | a | 28.671  | a | 24.302   | b |
| <b>Flood experience class</b>     | 10.084  | a | 0.87982 | a | 13.255   | b |
| <b>Building quality</b>           | 23.026  |   | 22.732  |   | 2.316    |   |
| <b>Building area</b>              | 263.25  | a | 211.06  | b | 335.73   | a |
| <b>Cellar</b>                     | 80.9%   | a | 82.6%   | a | 90.3%    | b |
| <b>Insured</b>                    | 23.5%   | a | 56.7%   | b | 22.4%    | a |
| <b>Loss ratio</b>                 | 0.10197 | a | 0.11257 | c | 0.029909 | b |

(a–d) Notation of subsamples that are statistically similar to each other; same letters mean similar subsamples; two letters next to a central value means it is similar to both letters' groups (see text for reading example).

Table S5. Central values of each variable per event grouped by similarity after post hoc tests with a significance of 0.05 (central value is the average of numeric Variables, the mode of nominal variables)

| <b>YEAR</b>                                                        | <b>2002</b> |   | <b>2005</b> |     | <b>2006</b> |       | <b>2010</b> |     | <b>2011</b> |       | <b>2013</b> |       |
|--------------------------------------------------------------------|-------------|---|-------------|-----|-------------|-------|-------------|-----|-------------|-------|-------------|-------|
| <b>n</b>                                                           | 1697        |   | 305         |     | 156         |       | 440         |     | 218         |       | 1652        |       |
| <b>Water depth</b>                                                 | 64.212      | a | -19.351     | b   | 18.816      | b,c   | 24.669      | c   | -23.271     | b,c   | 53.526      | d     |
| <b>Duration</b>                                                    | 142.89      | a | 52.371      | b   | 146.18      | c     | 57.962      | b   | 101.21      | a     | 206.04      | d     |
| <b>Velocity</b>                                                    | 32.326      | a | 29.304      | a,b | 26.533      | b,c   | 33.535      | a   | 23.876      | b,c   | 24.833      | c     |
| <b>Contamination</b>                                               | 0.67265     | a | 0.27        | b   | 0.35099     | b,c   | 0.54801     | d   | 0.25463     | b,c   | 0.45702     | c     |
| <b>Emergency measures</b>                                          | 44.137      | a | 57.344      | b,c | 69.103      | b     | 51.545      | a,c | 67.615      | b     | 59.467      | b     |
| <b>Property-level precautionary measures (PLPM) implementation</b> | 0.27991     | a | 0.78689     | b   | 1.141       | c     | 0.87045     | b   | 1.445       | e     | 0.96792     | d     |
| <b>Perceived Efficacy of PLPM</b>                                  | 31.527      | a | 27.931      | b   | 2.604       | b,c   | 25.882      | b   | 21.714      | c     | 2.641       | b,c   |
| <b>Flood experience class</b>                                      | 0.47087     | a | 12.156      | b   | 20.515      | c     | 0.9536      | d   | 21.814      | c     | 11.394      | b     |
| <b>Building quality</b>                                            | 22.285      | a | 22.694      | a   | 21.439      | a     | 25.353      | b   | 24.854      | b     | 22.439      | a     |
| <b>Building area</b>                                               | 195.65      | a | 466.25      | b   | 215.06      | a,b,c | 294.15      | a,c | 263.75      | b,c   | 217.33      | a     |
| <b>Cellar</b>                                                      | 82.5 %      |   | 87.4 %      |     | 84.5 %      |       | 81.6 %      |     | 88.4 %      |       | 81.3 %      |       |
| <b>Insured</b>                                                     | 41.2 %      | a | 26.9 %      | b   | 39.1 %      | a,c   | 50.5 %      | c   | 25.2 %      | a,b,c | 56.8 %      | a,b,c |
| <b>Loss ratio</b>                                                  | 0.12262     | a | 0.040601    | b   | 0.069922    | b,c   | 0.077278    | c   | 0.019505    | d     | 0.11732     | a     |

(a–d) Notation of subsamples that are statistically similar to each other; same letters mean similar subsamples; two letters next to a central value means it is similar to both letters' groups (see text for reading example).
